# Supplementary material for: Nodal-chain network, intersecting nodal rings and triple points coexisting in nonsymmorphic Ba3Si4
Source: Royal Society of Chemistry journal article supplement (doi:10.1039/c8cp02810a), 2018-01-01
Supplement: c8cp02810a1.pdf [file c8cp02810a1.pdf]

## Supplementary Information

### **Nodal chain network, intersecting nodal rings and triple points coexisting in $\text{Ba}_3\text{Si}_4$**

Jin Cai,<sup>a</sup> Yuee Xie,<sup>\*a</sup> Po-yao Chang,<sup>b</sup> Heung-Sik Kim,<sup>b</sup> Yuanping Chen<sup>\*a</sup>

<sup>a</sup> *School of Physics and Optoelectronics, Xiangtan University, Xiangtan, Hunan, 411105, China*

<sup>b</sup> *Department of Physics and Astronomy, Rutgers University, Piscataway, New Jersey 08854-8019, USA*

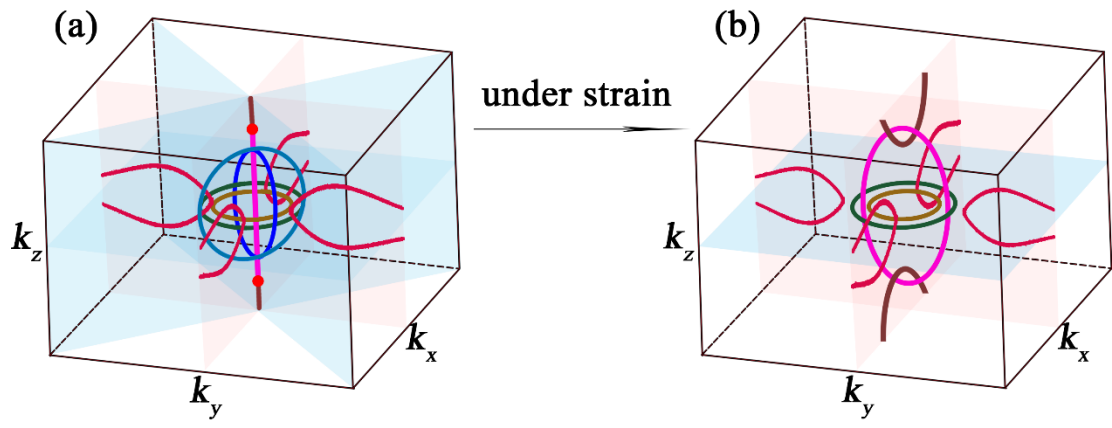

FIG. S1. (a) and (b) A whole topological phase for the structure without strain and under strain, respectively.

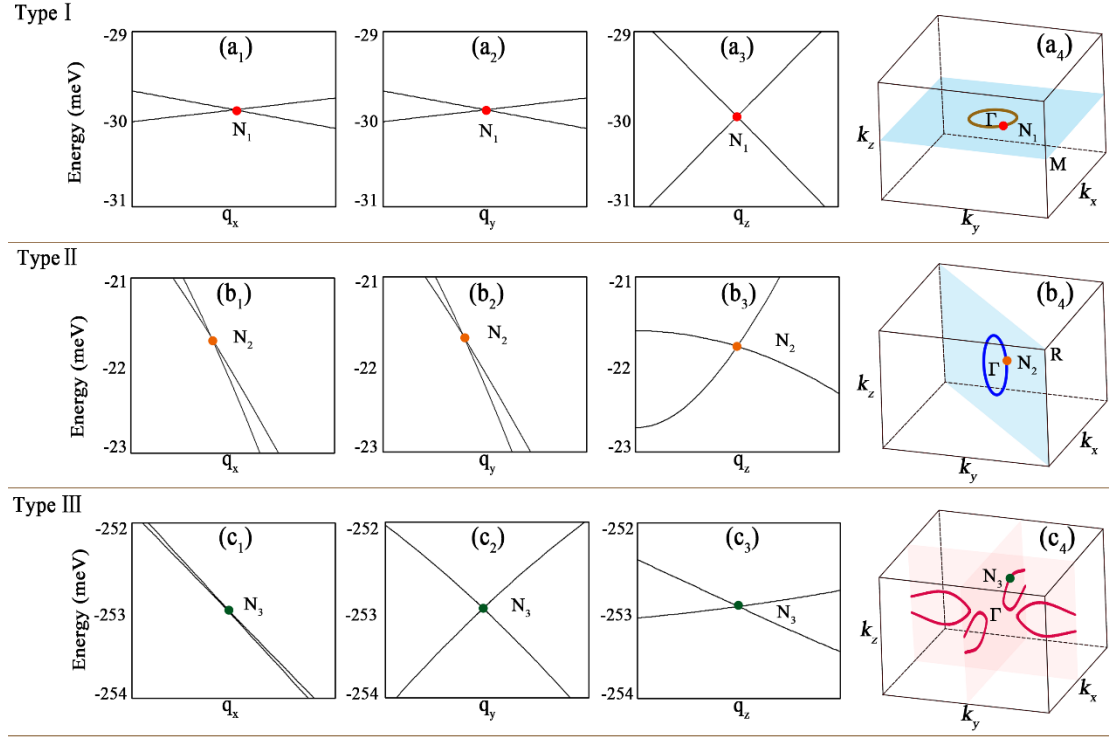

FIG. S2. (a<sub>1</sub>-a<sub>3</sub>) Band structures along three different directions parallel to  $k_{x/y/z}$  for the point  $N_1$  on the nodal ring (on the plane  $k_z = 0$ ) in (a<sub>4</sub>), which belongs to type-I nodal ring. (b<sub>1</sub>-b<sub>3</sub>) Band structures along three different directions parallel to  $k_{x/y/z}$  for the point  $N_2$  on the nodal ring (on the plane  $k_x = k_y$ ) in (b<sub>4</sub>), which belongs to type-II nodal ring. (c<sub>1</sub>-c<sub>3</sub>) Band structures along three different directions parallel to  $k_{x/y/z}$  for the point  $N_3$  on the nodal ring (on the plane  $k_y = 0$ ) in (c<sub>4</sub>), which belongs to type-III nodal ring.

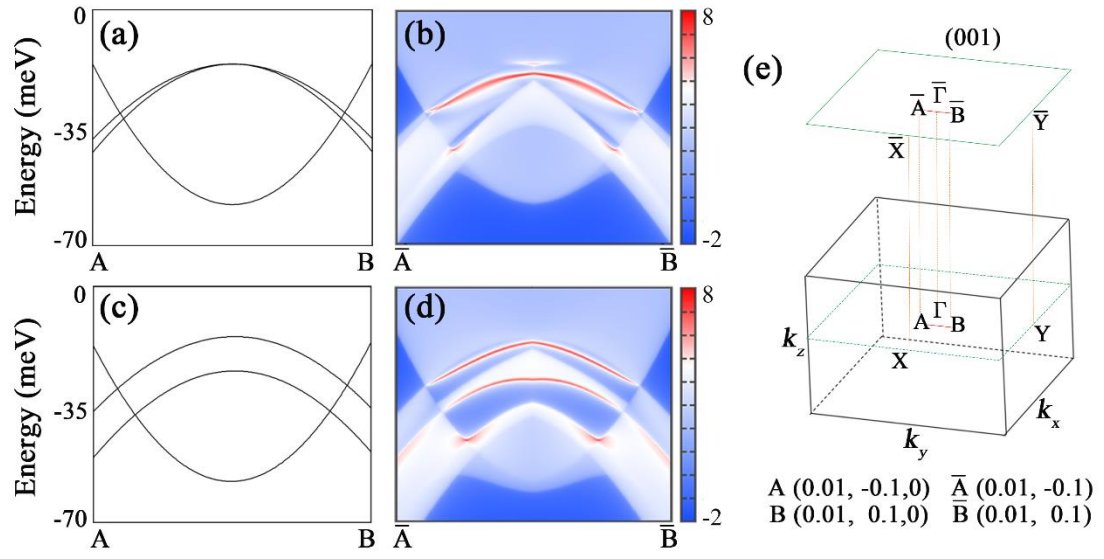

FIG. S3. Bulk band structure along A-B (a) and surface band structure along  $\bar{A} - \bar{B}$  on [001] surface (b) for  $\text{Ba}_3\text{Si}_4$  in the case of no strain. Bulk band structure along A-B (c) and surface band structure along  $\bar{A} - \bar{B}$  on [001] surface (d) for  $\text{Ba}_3\text{Si}_4$  under strain. (e) Bulk BZ and corresponding surface BZ, where the high-symmetry points and k paths are labeled.

|                      | Without strain     | With strain        |
|----------------------|--------------------|--------------------|
| Name                 | P42/MNM            | PNNM               |
| International Tables | 136                | 58                 |
| Long Name            | P42/M21/N2/M       | P21/N21/N2/M       |
| Identity             | x y z              | x y z              |
| Rotation Axis        | -x -y z            | -x -y z            |
|                      | y x -z             |                    |
|                      | -y -x -z           |                    |
| Mirror plane         | x y -z             | x y -z             |
|                      | -y -x z            |                    |
|                      | y x z              |                    |
| Glide plane          | x+1/2 -y+1/2 z+1/2 | x+1/2 -y+1/2 z+1/2 |
|                      | -x+1/2 y+1/2 z+1/2 | -x+1/2 y+1/2 z+1/2 |

Table S1 Symmetry elements of Ba<sub>3</sub>Si<sub>4</sub> without/with strain.
